# Supplementary material for: Density functional studies of model cerium oxide nanoparticles
Source: Royal Society of Chemistry journal article supplement (doi:10.1039/b805904g), 2008-01-01
Supplement: b805904g.pdf [file b805904g.pdf]

## Density Functional Studies of Model Cerium Oxide Nanoparticles

Christoph Loschen, Annapaola Migani, Stefan T. Bromley, Francesc Illas and  
Konstantin M. Neyman\*

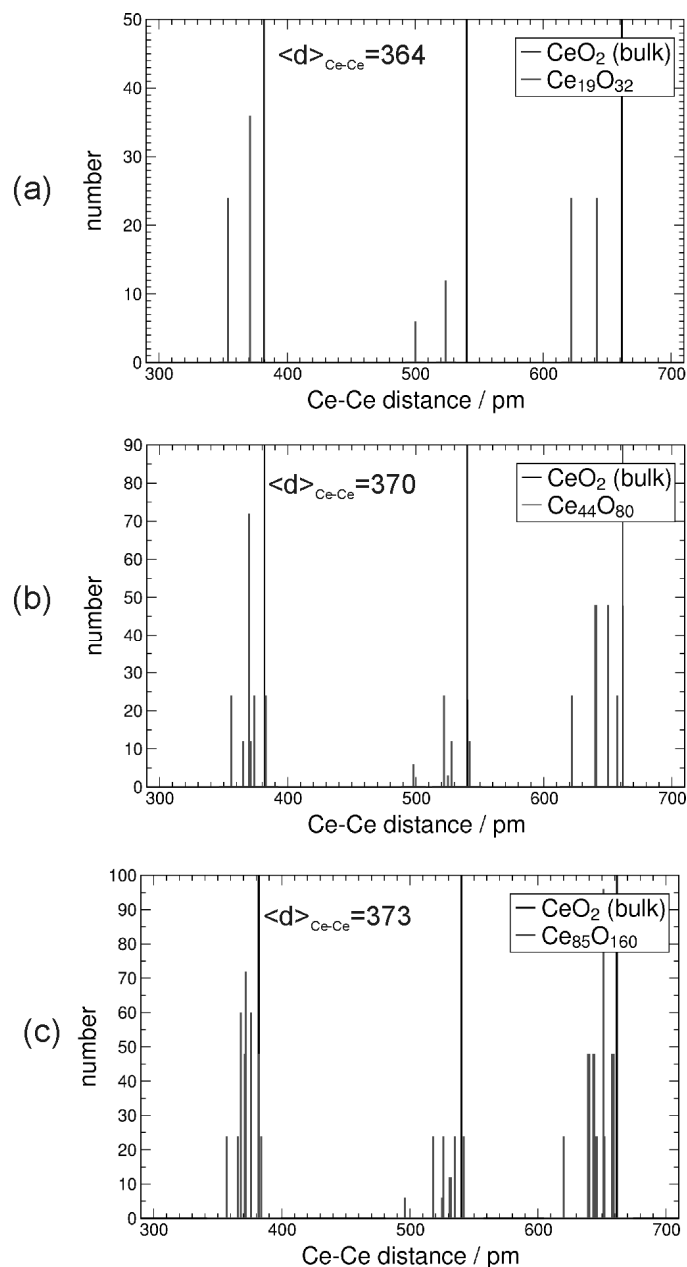

**Fig. S1** Pair distribution functions of Ce-Ce distances up to 0.7 nm in octahedral clusters (grey lines) a)  $\text{Ce}_{19}\text{O}_{32}$  (**b1**), b)  $\text{Ce}_{44}\text{O}_{80}$  (**c1**) and c)  $\text{Ce}_{85}\text{O}_{160}$  (**d1**). Average Ce-Ce distances  $\langle d \rangle$  for the nearest atoms are 364, 370 and 373 pm, respectively. The values calculated for  $\text{CeO}_2$  bulk are also shown in the panels a, b and c (black lines).

**Table S1.** Bond length ( $d$ ), dissociation energy ( $D_0$ , zero-point corrected) and vibrational frequency of the CeO molecule in its triplet state ( $\omega$ ). PAW calculations from this work. Experimental data from CRC Handbook of Chemistry and Physics, D.R. Lide, (ed.), CRC Press, Boca Raton, Florida, USA, 81st edition, 2000.

|        | $d / \text{pm}$ | $D_0 / \text{eV}$ | $\omega / \text{cm}^{-1}$ |
|--------|-----------------|-------------------|---------------------------|
| LDA+U  | 1.846           | 9.65              | 850                       |
| PW91+U | 1.845           | 8.78              | 836                       |
| Exp.   | 1.820           | 8.19              | 834                       |

**Table S2.** Calculated total energies of selected reference systems (eV). For  $\text{Ce}_{(\text{g})}$ , the  $^3\text{G}$ -like state of the  $4f5d6s^2$  configuration is calculated, which according to J-averaged experimental data is  $\sim 0.25$  eV over the multi-configurational  $^1\text{G}$  ground state [M. Dolg, H. Stoll and H. Preuss, *J. Chem. Phys.*, 1989, **90**, 1730.]. Note, that solid Ce has been calculated at the LDA+U ( $U_{\text{eff}} = 5$  eV) and the GGA+U ( $U_{\text{eff}} = 3$  eV) levels of theory.

| System                   | $E(\text{LDA+U})$ | $E(\text{PW91+U})$ |
|--------------------------|-------------------|--------------------|
| $\text{Ce}_{(\text{s})}$ | -5.59725          | -5.09685           |
| $\text{Ce}_{(\text{g})}$ | -0.45200          | -0.90312           |
| $\text{O}_2$             | -10.5224          | -9.82229           |
| $\text{O} (^3\text{P})$  | -1.496786         | -1.75612           |

**Table S3.** Calculated cohesive ( $E_c$ , reference are reactants in atomic gas phase states) and formation energies ( $E_f$ , reference are reactants in their respective ground states) as well as averaged nearest interatomic distances  $\langle d \rangle$  of the ceria bulk and nanoparticles: structures optimized at the LDA+U level ( $U_{\text{eff}} = 5$  eV), energies at the LDA+U ( $U_{\text{eff}}=5$  eV) and GGA+U (PW91,  $U_{\text{eff}}=3$  eV) levels of theory.  $E_f$  was calculated with respect to:  $\text{Ce(s)} + 0.5(\text{m/n}) \text{O}_2(\text{g}) \rightarrow 1/\text{n Ce}_n\text{O}_m$ .  $E_c(\text{exp.})$  for  $\text{CeO}_2$  and  $\text{Ce}_2\text{O}_3$  was obtained from the corresponding Born-Haber cycle:  $E_c(\text{exp.}) = E_f(\text{exp.}) - E_{\text{subl}}(\text{exp.}) - D_{\text{O}_2}(\text{exp.})$ . For the CeO molecule  $E_c$  corresponds to the atomization energy.  $E_f(\text{exp.})$  for CeO molecule was calculated as:  $E_f(\text{exp.}) = D_{\text{CeO}}(\text{exp.}) + E_{\text{subl}}(\text{exp.}) + 0.5D_{\text{O}_2}(\text{exp.})$ ,  $E_{\text{subl}}(\text{exp.})$  is the experimental energy of sublimation of metallic Ce at 298 K [C. E. Habermann and A. H. Daane, *J. Chem. Phys.*, 1964, **41**, 2818]. For clusters,  $E_c$  values shown are estimated upper limits - the unknown *exact* groundstates of the clusters might be very slightly lower in energy.

| System                            | Label     | $\langle N \rangle$ | Ce <sup>+3</sup> /Ce <sup>+4</sup> | $\langle d_{\text{Ce-Ce}} \rangle$ | pm    | $\langle d_{\text{Ce-O}} \rangle$ | pm    | $E_c(\text{LDA+U})$ | eV     | $E_c(\text{PW91+U})$ | eV     | $E_c(\text{exp.})$ | eV     | $E_f(\text{LDA+U})$ | eV     | $E_f(\text{PW91+U})$ | eV     | $E_f(\text{exp.})$ | eV |
|-----------------------------------|-----------|---------------------|------------------------------------|------------------------------------|-------|-----------------------------------|-------|---------------------|--------|----------------------|--------|--------------------|--------|---------------------|--------|----------------------|--------|--------------------|----|
| CeO <sub>2</sub>                  | bulk      | 8.00                | 0/1                                | 381.8                              | 233.8 | 233.8                             | 233.8 | -23.53              | -20.85 | -20.85               | -21.24 | -21.24             | -10.86 | -10.86              | -10.34 | -10.34               | -11.14 | -11.14             |    |
| Ce <sub>2</sub> O <sub>3</sub>    | bulk      | (7)                 | 2/0                                | 378.5                              | 246.0 | 246.0                             | 246.0 | -40.22              | -35.33 | -35.33               | -36.00 | -36.00             | -18.63 | -18.63              | -17.47 | -17.47               | -18.56 | -18.56             |    |
| Ce <sub>6</sub> O <sub>8</sub>    | <b>a1</b> | 4.00                | -                                  | 342.8                              | 225.3 | 225.3                             | 225.3 | -100                | -89    | -89                  | -      | -                  | -6.52  | -6.52               | -6.46  | -6.46                | -      | -                  |    |
| Ce <sub>19</sub> O <sub>32</sub>  | <b>b1</b> | 5.47                | 12/7                               | 364.0                              | 228.3 | 228.3                             | 228.3 | -378                | -338   | -338                 | -      | -                  | -8.42  | -8.42               | -8.27  | -8.27                | -      | -                  |    |
| Ce <sub>44</sub> O <sub>80</sub>  | <b>c1</b> | 6.18                | 16/28                              | 370.0                              | 229.4 | 229.4                             | 229.4 | -932                | -831   | -831                 | -      | -                  | -9.17  | -9.17               | -8.95  | -8.95                | -      | -                  |    |
| Ce <sub>85</sub> O <sub>160</sub> | <b>d1</b> | 6.49                | 20/65                              | 372.6                              | 229.9 | 229.9                             | 229.9 | -1855               | -1650  | -1650                | -      | -                  | -9.60  | -9.60               | -9.28  | -9.28                | -      | -                  |    |
| Ce <sub>13</sub> O <sub>32</sub>  | <b>b2</b> | 6.15                | -                                  | 370.3                              | 222.5 | 222.5                             | 222.5 | -                   | -256   | -256                 | -      | -                  | -      | -                   | -7.71  | -7.71                | -      | -                  |    |
| Ce <sub>13</sub> O <sub>26</sub>  | <b>b3</b> | 5.15                | 0/13                               | 363.2                              | 222.8 | 222.8                             | 222.8 | -                   | -247   | -247                 | -      | -                  | -      | -                   | -8.53  | -8.53                | -      | -                  |    |
| Ce <sub>13</sub> O <sub>20</sub>  | <b>b4</b> | 4.30                | 12/1                               | 379.1                              | 225.7 | 225.7                             | 225.7 | -                   | -210   | -210                 | -      | -                  | -      | -                   | -7.10  | -7.10                | -      | -                  |    |
| Ce <sub>38</sub> O <sub>80</sub>  | <b>c2</b> | 6.53                | -                                  | 372.5                              | 227.1 | 227.1                             | 227.1 | -                   | -756   | -756                 | -      | -                  | -      | -                   | -9.05  | -9.05                | -      | -                  |    |
| Ce <sub>38</sub> O <sub>74</sub>  | <b>c3</b> | 6.26                | 4/34                               | 373.9                              | 229.3 | 229.3                             | 229.3 | -                   | -738   | -738                 | -      | -                  | -      | -                   | -9.09  | -9.09                | -      | -                  |    |
| Ce <sub>38</sub> O <sub>68</sub>  | <b>c4</b> | 5.90                | 16/22                              | 375.3                              | 229.5 | 229.5                             | 229.5 | -                   | -706   | -706                 | -      | -                  | -      | -                   | -8.74  | -8.74                | -      | -                  |    |
| CeO                               | molec.    | 1.00                | -                                  | -                                  | 184.6 | 184.6                             | 184.6 | -9.70               | -8.83  | -8.83                | -8.19  | -8.19              | -0.79  | -0.79               | -1.48  | -1.48                | -0.79  | -0.79              |    |

**Table S4.** Cartesian atomic coordinates (Å) of the cluster Ce<sub>19</sub>O<sub>32</sub> (**b1**) optimised at the spin-restricted (SR) LDA+U level; the state corresponds to the lowest calculated spin-polarized (SP) single-point LDA+U energy for the optimal SR geometry (SP//SR), -434.73 eV.

|      |          |          |          |
|------|----------|----------|----------|
| Ce1  | 11.19377 | 11.19377 | 16.51912 |
| Ce2  | 13.81520 | 11.19377 | 14.14186 |
| Ce3  | 8.57234  | 11.19377 | 14.14186 |
| Ce4  | 11.19377 | 13.81520 | 14.14186 |
| Ce5  | 11.19377 | 8.57234  | 14.14186 |
| Ce6  | 13.81520 | 13.81520 | 11.52045 |
| Ce7  | 13.81520 | 8.57234  | 11.52045 |
| Ce8  | 8.57234  | 13.81520 | 11.52045 |
| Ce9  | 8.57234  | 8.57234  | 11.52045 |
| Ce10 | 16.19244 | 11.19377 | 11.52045 |
| Ce11 | 11.19377 | 16.19244 | 11.52045 |
| Ce12 | 11.19377 | 11.19377 | 11.52045 |
| Ce13 | 11.19377 | 6.19508  | 11.52045 |
| Ce14 | 6.19508  | 11.19377 | 11.52045 |
| Ce15 | 13.81520 | 11.19377 | 8.89902  |
| Ce16 | 8.57234  | 11.19377 | 8.89902  |
| Ce17 | 11.19377 | 13.81520 | 8.89902  |
| Ce18 | 11.19377 | 8.57234  | 8.89902  |
| Ce19 | 11.19377 | 11.19377 | 6.52177  |
| O1   | 9.80842  | 9.80842  | 15.57467 |
| O2   | 12.57912 | 9.80842  | 15.57467 |
| O3   | 9.80842  | 12.57912 | 15.57467 |
| O4   | 12.57912 | 12.57912 | 15.57467 |
| O5   | 15.24798 | 9.80842  | 12.90581 |
| O6   | 9.80842  | 15.24798 | 12.90581 |
| O7   | 9.85184  | 9.85184  | 12.86236 |
| O8   | 15.24798 | 12.57912 | 12.90581 |
| O9   | 9.85184  | 12.53570 | 12.86236 |
| O10  | 9.80842  | 7.13956  | 12.90581 |
| O11  | 12.57912 | 15.24798 | 12.90581 |
| O12  | 12.53570 | 9.85184  | 12.86236 |
| O13  | 7.13956  | 9.80842  | 12.90581 |
| O14  | 12.53570 | 12.53570 | 12.86236 |
| O15  | 12.57912 | 7.13956  | 12.90581 |
| O16  | 7.13956  | 12.57912 | 12.90581 |
| O17  | 15.24798 | 9.80842  | 10.13510 |
| O18  | 9.80842  | 15.24798 | 10.13510 |
| O19  | 9.85184  | 9.85184  | 10.17852 |
| O20  | 12.57912 | 15.24798 | 10.13510 |
| O21  | 12.53570 | 9.85184  | 10.17852 |
| O22  | 7.13956  | 9.80842  | 10.13510 |
| O23  | 15.24798 | 12.57912 | 10.1351  |
| O24  | 9.85184  | 12.53570 | 10.17852 |
| O25  | 9.80842  | 7.13956  | 10.13510 |
| O26  | 12.53570 | 12.53570 | 10.17852 |
| O27  | 12.57912 | 7.13956  | 10.13510 |
| O28  | 7.13956  | 12.57912 | 10.13510 |
| O29  | 9.80842  | 9.80842  | 7.46624  |
| O30  | 9.80842  | 12.57912 | 7.46624  |
| O31  | 12.57912 | 9.80842  | 7.46624  |
| O32  | 12.57912 | 12.57912 | 7.46624  |

**Table S5.** Cartesian atomic coordinates (Å) of the cluster Ce<sub>19</sub>O<sub>32</sub> (**b1**) optimised at the SP LDA+U level; the state corresponds to partially localised Ce4*f* electrons (see Table 4) and is characterised by the total energy value -435.93 eV.

|      |          |          |          |
|------|----------|----------|----------|
| Ce1  | 11.19377 | 11.19377 | 16.65434 |
| Ce2  | 13.78561 | 11.19377 | 14.18664 |
| Ce3  | 8.60193  | 11.19377 | 14.18664 |
| Ce4  | 11.19377 | 13.85183 | 14.22039 |
| Ce5  | 11.19377 | 8.53571  | 14.22039 |
| Ce6  | 13.77719 | 13.81227 | 11.52045 |
| Ce7  | 13.77719 | 8.57527  | 11.52045 |
| Ce8  | 8.61035  | 13.81227 | 11.52045 |
| Ce9  | 8.61035  | 8.57527  | 11.52045 |
| Ce10 | 16.22809 | 11.19377 | 11.52045 |
| Ce11 | 11.19377 | 16.26411 | 11.52045 |
| Ce12 | 11.19377 | 11.19377 | 11.52045 |
| Ce13 | 11.19377 | 6.12341  | 11.52045 |
| Ce14 | 6.15942  | 11.19377 | 11.52045 |
| Ce15 | 13.78561 | 11.19377 | 8.85425  |
| Ce16 | 8.60193  | 11.19377 | 8.85425  |
| Ce17 | 11.19377 | 13.85183 | 8.82050  |
| Ce18 | 11.19377 | 8.53571  | 8.82050  |
| Ce19 | 11.19377 | 11.19377 | 6.38655  |
| O1   | 9.76838  | 9.82584  | 15.59680 |
| O2   | 12.61916 | 9.82584  | 15.59680 |
| O3   | 9.76838  | 12.56170 | 15.59680 |
| O4   | 12.61916 | 12.56170 | 15.59680 |
| O5   | 15.17812 | 9.77645  | 12.88979 |
| O6   | 9.74197  | 15.22533 | 12.86529 |
| O7   | 9.87035  | 9.86757  | 12.83978 |
| O8   | 15.17812 | 12.61109 | 12.88979 |
| O9   | 9.87035  | 12.51997 | 12.83978 |
| O10  | 9.74197  | 7.16221  | 12.86529 |
| O11  | 12.64556 | 15.22533 | 12.86529 |
| O12  | 12.51719 | 9.86757  | 12.83978 |
| O13  | 7.20942  | 9.77645  | 12.88979 |
| O14  | 12.51719 | 12.51997 | 12.83978 |
| O15  | 12.64556 | 7.16221  | 12.86529 |
| O16  | 7.20942  | 12.61109 | 12.88979 |
| O17  | 15.17812 | 9.77645  | 10.15112 |
| O18  | 9.74197  | 15.22533 | 10.17562 |
| O19  | 9.87035  | 9.86757  | 10.20111 |
| O20  | 12.64556 | 15.22533 | 10.17562 |
| O21  | 12.51719 | 9.86757  | 10.20111 |
| O22  | 7.20942  | 9.77645  | 10.15112 |
| O23  | 15.17812 | 12.61109 | 10.15112 |
| O24  | 9.87035  | 12.51997 | 10.20111 |
| O25  | 9.74197  | 7.16221  | 10.17562 |
| O26  | 12.51719 | 12.51997 | 10.20111 |
| O27  | 12.64556 | 7.16221  | 10.17562 |
| O28  | 7.20942  | 12.61109 | 10.15112 |
| O29  | 9.76838  | 9.82584  | 7.44411  |
| O30  | 9.76838  | 12.56170 | 7.44411  |
| O31  | 12.61916 | 9.82584  | 7.44411  |
| O32  | 12.61916 | 12.56170 | 7.44411  |

**Table S6.** Cartesian atomic coordinates (Å) of the cluster Ce<sub>19</sub>O<sub>32</sub> (**b1**) optimised at the SP LDA+U level; the state corresponds to fully localised Ce4*f* electrons (see Table 4) and is characterised by the total energy value -437.67 eV.

|      |          |          |          |
|------|----------|----------|----------|
| Ce1  | 10.81482 | 11.27949 | 16.46965 |
| Ce2  | 13.65990 | 11.25214 | 14.18546 |
| Ce3  | 8.27475  | 11.27400 | 13.86012 |
| Ce4  | 10.98344 | 13.84300 | 14.00776 |
| Ce5  | 10.95607 | 8.68231  | 14.04707 |
| Ce6  | 13.79515 | 13.88470 | 11.53507 |
| Ce7  | 13.72493 | 8.61362  | 11.56782 |
| Ce8  | 8.52982  | 13.87129 | 11.21488 |
| Ce9  | 8.46240  | 8.60150  | 11.25676 |
| Ce10 | 16.21404 | 11.17626 | 11.60927 |
| Ce11 | 11.11363 | 16.33312 | 11.44910 |
| Ce12 | 11.12748 | 11.24317 | 11.39254 |
| Ce13 | 11.13348 | 6.15458  | 11.52424 |
| Ce14 | 6.05343  | 11.30690 | 10.99042 |
| Ce15 | 13.86517 | 11.21313 | 8.91369  |
| Ce16 | 8.71419  | 11.23322 | 8.60401  |
| Ce17 | 11.30909 | 13.92072 | 8.74590  |
| Ce18 | 11.26940 | 8.52664  | 8.78408  |
| Ce19 | 11.43810 | 11.20561 | 6.31668  |
| O1   | 9.51630  | 9.84614  | 15.34931 |
| O2   | 12.22708 | 9.82819  | 15.50489 |
| O3   | 9.53948  | 12.71589 | 15.32033 |
| O4   | 12.24864 | 12.69779 | 15.48774 |
| O5   | 15.07774 | 9.73203  | 12.92144 |
| O6   | 9.62666  | 15.20183 | 12.73925 |
| O7   | 9.73152  | 9.93722  | 12.66012 |
| O8   | 15.18225 | 12.56970 | 12.94633 |
| O9   | 9.73195  | 12.58425 | 12.61224 |
| O10  | 9.71361  | 7.24602  | 12.87203 |
| O11  | 12.35999 | 15.26421 | 12.97097 |
| O12  | 12.36405 | 9.92088  | 12.79217 |
| O13  | 6.91249  | 9.93498  | 12.46502 |
| O14  | 12.36189 | 12.57017 | 12.79353 |
| O15  | 12.45569 | 7.30361  | 12.96692 |
| O16  | 7.02117  | 12.77180 | 12.40962 |
| O17  | 15.14570 | 9.77317  | 10.18269 |
| O18  | 9.72904  | 15.28516 | 10.00412 |
| O19  | 9.88004  | 9.92834  | 9.99191  |
| O20  | 12.56480 | 15.36225 | 10.12959 |
| O21  | 12.52365 | 9.90214  | 10.17307 |
| O22  | 7.20703  | 9.94882  | 9.63217  |
| O23  | 15.23821 | 12.51314 | 10.09967 |
| O24  | 9.89297  | 12.56743 | 9.99159  |
| O25  | 9.85078  | 7.10673  | 10.02997 |
| O26  | 12.53930 | 12.53875 | 10.12993 |
| O27  | 12.68201 | 7.18139  | 10.23992 |
| O28  | 7.28868  | 12.69060 | 9.68442  |
| O29  | 9.93818  | 9.85527  | 7.29139  |
| O30  | 9.94888  | 12.56798 | 7.27588  |
| O31  | 12.79999 | 9.85483  | 7.47005  |
| O32  | 12.81314 | 12.56913 | 7.44232  |

**Table S7.** Cartesian atomic coordinates (Å) of the cluster Ce<sub>44</sub>O<sub>80</sub> (**c1**) optimised at the SR LDA+U level; the state corresponds to the lowest calculated single-point SP LDA+U energy for the optimal SR geometry (SP//SR), -1070.60 eV.

|      |          |          |          |
|------|----------|----------|----------|
| Ce1  | 13.89378 | 13.89378 | 21.96472 |
| Ce2  | 16.53495 | 13.89378 | 19.58134 |
| Ce3  | 11.25257 | 13.89378 | 19.58134 |
| Ce4  | 13.89378 | 16.53495 | 19.58134 |
| Ce5  | 13.89378 | 11.25257 | 19.58134 |
| Ce6  | 16.60348 | 16.60348 | 17.06945 |
| Ce7  | 16.60348 | 11.18405 | 17.06945 |
| Ce8  | 11.18405 | 16.60348 | 17.06945 |
| Ce9  | 11.18405 | 11.18405 | 17.06945 |
| Ce10 | 19.11535 | 13.89378 | 17.00092 |
| Ce11 | 13.89378 | 19.11535 | 17.00092 |
| Ce12 | 13.89378 | 13.89378 | 16.98433 |
| Ce13 | 13.89378 | 8.67218  | 17.00092 |
| Ce14 | 8.67218  | 13.89378 | 17.00092 |
| Ce15 | 21.49872 | 13.89378 | 14.35974 |
| Ce16 | 16.53495 | 19.11535 | 14.35974 |
| Ce17 | 16.51836 | 13.89378 | 14.35974 |
| Ce18 | 16.53495 | 8.67218  | 14.35974 |
| Ce19 | 11.25257 | 19.11535 | 14.35974 |
| Ce20 | 11.26917 | 13.89378 | 14.35974 |
| Ce21 | 11.25257 | 8.67218  | 14.35974 |
| Ce22 | 6.28881  | 13.89378 | 14.35974 |
| Ce32 | 19.11535 | 16.53495 | 14.35974 |
| Ce24 | 19.11535 | 11.25257 | 14.35974 |
| Ce25 | 13.89378 | 21.49872 | 14.35974 |
| Ce26 | 3.89378  | 16.51836 | 14.35974 |
| Ce27 | 13.89378 | 11.26917 | 14.35974 |
| Ce28 | 13.89378 | 6.28881  | 14.35974 |
| Ce29 | 8.67218  | 16.53495 | 14.35974 |
| Ce30 | 8.67218  | 11.25257 | 14.35974 |
| Ce31 | 16.60348 | 16.60348 | 11.65004 |
| Ce32 | 16.60348 | 11.18405 | 11.65004 |
| Ce33 | 11.18405 | 16.60348 | 11.65004 |
| Ce34 | 11.18405 | 11.18405 | 11.65004 |
| Ce35 | 19.11535 | 13.89378 | 11.71857 |
| Ce36 | 13.89378 | 19.11535 | 11.71857 |
| Ce37 | 13.89378 | 13.89378 | 11.73516 |
| Ce38 | 13.89378 | 8.67218  | 11.71857 |
| Ce39 | 8.67218  | 13.89378 | 11.71857 |
| Ce40 | 16.53495 | 13.89378 | 9.13815  |
| Ce41 | 11.25257 | 13.89378 | 9.13815  |
| Ce42 | 13.89378 | 16.53495 | 9.13815  |
| Ce43 | 13.89378 | 11.25257 | 9.13815  |
| Ce44 | 13.89378 | 13.89378 | 6.75477  |
| O1   | 12.51816 | 12.51816 | 21.02804 |
| O2   | 15.26937 | 12.51816 | 21.02804 |
| O3   | 12.51816 | 15.26937 | 21.02804 |
| O4   | 15.26937 | 15.26937 | 21.02804 |
| O5   | 17.93468 | 12.50619 | 18.40064 |
| O6   | 12.50619 | 17.93468 | 18.40064 |
| O7   | 12.55677 | 12.55677 | 18.34983 |

Electronic Supplementary Material for PCCP  
This journal is © The Owner Societies 2008

|     |          |          |          |
|-----|----------|----------|----------|
| O8  | 17.93468 | 15.28134 | 18.40064 |
| O9  | 12.55677 | 15.23076 | 18.34983 |
| O10 | 12.50619 | 9.85285  | 18.40064 |
| O11 | 15.28134 | 17.93468 | 18.40064 |
| O12 | 15.23076 | 12.55677 | 18.34983 |
| O13 | 9.85285  | 12.50619 | 18.40064 |
| O14 | 15.23076 | 15.23076 | 18.34983 |
| O15 | 15.28134 | 9.85285  | 18.40064 |
| O16 | 9.85285  | 15.28134 | 18.40064 |
| O17 | 17.93468 | 17.93468 | 15.74733 |
| O18 | 17.88386 | 12.55677 | 15.69673 |
| O19 | 12.55677 | 17.88386 | 15.69673 |
| O20 | 12.53680 | 12.53680 | 15.71670 |
| O21 | 12.51816 | 7.22545  | 15.73534 |
| O22 | 7.22545  | 12.51816 | 15.73534 |
| O23 | 20.56208 | 12.51816 | 15.73534 |
| O24 | 15.23076 | 17.88386 | 15.69673 |
| O25 | 15.25073 | 12.53680 | 15.71670 |
| O26 | 15.26937 | 7.22545  | 15.73534 |
| O27 | 9.85285  | 17.93468 | 15.74733 |
| O28 | 9.90367  | 12.55677 | 15.69673 |
| O29 | 7.88386  | 15.23076 | 15.69673 |
| O30 | 17.93468 | 9.85285  | 15.74733 |
| O31 | 12.51816 | 20.56208 | 15.73534 |
| O32 | 12.53680 | 15.25073 | 15.71670 |
| O33 | 12.55677 | 9.90367  | 15.69673 |
| O34 | 7.22545  | 15.26937 | 15.73534 |
| O35 | 20.56208 | 15.26937 | 15.73534 |
| O36 | 15.26937 | 20.56208 | 15.73534 |
| O37 | 15.25073 | 15.25073 | 15.71670 |
| O38 | 15.23076 | 9.90367  | 15.69673 |
| O39 | 9.90367  | 15.23076 | 15.69673 |
| O40 | 9.85285  | 9.85285  | 15.74733 |
| O41 | 17.93468 | 17.93468 | 12.97216 |
| O42 | 17.88386 | 12.55677 | 13.02276 |
| O43 | 12.55677 | 17.88386 | 13.02276 |
| O44 | 12.53680 | 12.53680 | 13.00279 |
| O45 | 12.51816 | 7.22545  | 12.98412 |
| O46 | 7.22545  | 12.51816 | 12.98412 |
| O47 | 17.88386 | 15.23076 | 13.02276 |
| O48 | 17.93468 | 9.85285  | 12.97216 |
| O49 | 12.51816 | 20.56208 | 12.98412 |
| O50 | 12.53680 | 15.25073 | 13.00279 |
| O51 | 12.55677 | 9.90367  | 13.02276 |
| O52 | 7.22545  | 15.26937 | 12.98412 |
| O53 | 20.56208 | 12.51816 | 12.98412 |
| O54 | 15.23076 | 17.88386 | 13.02276 |
| O55 | 15.25073 | 12.53680 | 13.00279 |
| O56 | 15.26937 | 7.22545  | 12.98412 |
| O57 | 9.85285  | 17.93468 | 12.97216 |
| O58 | 9.90367  | 12.55677 | 13.02276 |
| O59 | 20.56208 | 15.26937 | 12.98412 |
| O60 | 15.26937 | 20.56208 | 12.98412 |
| O61 | 15.25073 | 15.25073 | 13.00279 |
| O62 | 15.23076 | 9.90367  | 13.02276 |



|     |          |          |          |
|-----|----------|----------|----------|
| O63 | 9.90367  | 15.23076 | 13.02276 |
| O64 | 9.85285  | 9.85285  | 12.97216 |
| O65 | 17.93468 | 12.50619 | 10.31884 |
| O66 | 12.50619 | 17.93468 | 10.31884 |
| O67 | 12.55677 | 12.55677 | 10.36966 |
| O68 | 15.28134 | 17.93468 | 10.31884 |
| O69 | 15.23076 | 12.55677 | 10.36966 |
| O70 | 9.85285  | 12.50619 | 10.31884 |
| O71 | 17.93468 | 15.28134 | 10.31884 |
| O72 | 12.55677 | 15.23076 | 10.36966 |
| O73 | 12.50619 | 9.85285  | 10.31884 |
| O74 | 15.23076 | 15.23076 | 10.36966 |
| O75 | 15.28134 | 9.85285  | 10.31884 |
| O76 | 9.85285  | 15.28134 | 10.31884 |
| O77 | 12.51816 | 12.51816 | 7.69142  |
| O78 | 12.51816 | 15.26937 | 7.69142  |
| O79 | 15.26937 | 12.51816 | 7.69142  |
| O80 | 15.26937 | 15.26937 | 7.69142  |

**Table S8.** Cartesian atomic coordinates (Å) of the cluster Ce<sub>44</sub>O<sub>80</sub> (**c1**) optimised at the SP LDA+U level; the state corresponds to the lowest calculated energy -1072.46 eV.

|      |          |          |          |
|------|----------|----------|----------|
| Ce1  | 13.89378 | 13.89378 | 21.96549 |
| Ce2  | 16.56947 | 13.89378 | 19.59850 |
| Ce3  | 11.21806 | 13.89378 | 19.59850 |
| Ce4  | 13.89378 | 16.56947 | 19.59850 |
| Ce5  | 13.89378 | 11.21806 | 19.59850 |
| Ce6  | 16.60848 | 16.60848 | 17.07445 |
| Ce7  | 16.60848 | 11.17905 | 17.07445 |
| Ce8  | 11.17905 | 16.60848 | 17.07445 |
| Ce9  | 11.17905 | 11.17905 | 17.07445 |
| Ce10 | 19.13251 | 13.89378 | 17.03544 |
| Ce11 | 13.89378 | 19.13251 | 17.03544 |
| Ce12 | 13.89378 | 13.89378 | 17.00200 |
| Ce13 | 13.89378 | 8.65502  | 17.03544 |
| Ce14 | 8.65502  | 13.89378 | 17.03544 |
| Ce15 | 21.49950 | 13.89378 | 14.35974 |
| Ce16 | 16.56947 | 19.13251 | 14.35974 |
| Ce17 | 16.53603 | 13.89378 | 14.35974 |
| Ce18 | 16.56947 | 8.65502  | 14.35974 |
| Ce19 | 11.21806 | 19.13251 | 14.35974 |
| Ce20 | 11.25149 | 13.89378 | 14.35974 |
| Ce21 | 11.21806 | 8.65502  | 14.35974 |
| Ce22 | 6.28803  | 13.89378 | 14.35974 |
| Ce23 | 19.13251 | 16.56947 | 14.35974 |
| Ce24 | 19.13251 | 11.21806 | 14.35974 |
| Ce25 | 13.89378 | 21.49950 | 14.35974 |
| Ce26 | 13.89378 | 16.53603 | 14.35974 |
| Ce27 | 13.89378 | 11.25149 | 14.35974 |
| Ce28 | 13.89378 | 6.28803  | 14.35974 |
| Ce29 | 8.65502  | 16.56947 | 14.35974 |
| Ce30 | 8.65502  | 11.21806 | 14.35974 |
| Ce31 | 16.60848 | 16.60848 | 11.64504 |

Electronic Supplementary Material for PCCP  
This journal is © The Owner Societies 2008

|      |          |          |          |
|------|----------|----------|----------|
| Ce32 | 16.60848 | 11.17905 | 11.64504 |
| Ce33 | 11.17905 | 16.60848 | 11.64504 |
| Ce34 | 11.17905 | 11.17905 | 11.64504 |
| Ce35 | 19.13251 | 13.89378 | 11.68405 |
| Ce36 | 13.89378 | 19.13251 | 11.68405 |
| Ce37 | 13.89378 | 13.89378 | 11.71749 |
| Ce38 | 13.89378 | 8.65502  | 11.68405 |
| Ce39 | 8.65502  | 13.89378 | 11.68405 |
| Ce40 | 16.56947 | 13.89378 | 9.12098  |
| Ce41 | 11.21806 | 13.89378 | 9.12098  |
| Ce42 | 13.89378 | 16.56947 | 9.12098  |
| Ce43 | 13.89378 | 11.21806 | 9.12098  |
| Ce44 | 13.89378 | 13.89378 | 6.75400  |
| O1   | 12.53737 | 12.53737 | 21.08901 |
| O2   | 15.25016 | 12.53737 | 21.08901 |
| O3   | 12.53737 | 15.25016 | 21.08901 |
| O4   | 15.25016 | 15.25016 | 21.08901 |
| O5   | 17.93472 | 12.45711 | 18.40069 |
| O6   | 12.45711 | 17.93472 | 18.40069 |
| O7   | 12.56204 | 12.56204 | 18.34947 |
| O8   | 17.93472 | 15.33042 | 18.40069 |
| O9   | 12.56204 | 15.22549 | 18.34947 |
| O10  | 12.45711 | 9.85281  | 18.40069 |
| O11  | 15.33042 | 17.93472 | 18.40069 |
| O12  | 15.22549 | 12.56204 | 18.34947 |
| O13  | 9.85281  | 12.45711 | 18.40069 |
| O14  | 15.22549 | 15.22549 | 18.34947 |
| O15  | 15.33042 | 9.85281  | 18.40069 |
| O16  | 9.85281  | 15.33042 | 18.40069 |
| O17  | 17.93472 | 17.93472 | 15.79641 |
| O18  | 17.88351 | 12.56204 | 15.69146 |
| O19  | 12.56204 | 17.88351 | 15.69146 |
| O20  | 12.54364 | 12.54364 | 15.70986 |
| O21  | 12.53737 | 7.16449  | 15.71612 |
| O22  | 7.16449  | 12.53737 | 15.71612 |
| O23  | 20.62304 | 12.53737 | 15.71612 |
| O24  | 15.22549 | 17.88351 | 15.69146 |
| O25  | 15.24389 | 12.54364 | 15.70986 |
| O26  | 15.25016 | 7.16449  | 15.71612 |
| O27  | 9.85281  | 17.93472 | 15.79641 |
| O28  | 9.90402  | 12.56204 | 15.69146 |
| O29  | 17.88351 | 15.22549 | 15.69146 |
| O30  | 17.93472 | 9.85281  | 15.79641 |
| O31  | 12.53737 | 20.62304 | 15.71612 |
| O32  | 12.54364 | 15.24389 | 15.70986 |
| O33  | 12.56204 | 9.90402  | 15.69146 |
| O34  | 7.16449  | 15.25016 | 15.71612 |
| O35  | 15.25016 | 20.62304 | 15.71612 |
| O37  | 15.24389 | 15.24389 | 15.70986 |
| O38  | 15.22549 | 9.90402  | 15.69146 |
| O39  | 9.90402  | 15.22549 | 15.69146 |
| O40  | 9.85281  | 9.85281  | 15.79641 |
| O41  | 17.93472 | 17.93472 | 12.92308 |
| O42  | 17.88351 | 12.56204 | 13.02803 |
| O43  | 12.56204 | 17.88351 | 13.02803 |

Electronic Supplementary Material for PCCP  
This journal is © The Owner Societies 2008

|     |          |          |          |
|-----|----------|----------|----------|
| O44 | 12.54364 | 12.54364 | 13.00963 |
| O45 | 12.53737 | 7.16449  | 13.00334 |
| O46 | 7.16449  | 12.53737 | 13.00334 |
| O47 | 17.88351 | 15.22549 | 13.02803 |
| O48 | 17.93472 | 9.85281  | 12.92308 |
| O49 | 12.53737 | 20.62304 | 13.00334 |
| O50 | 12.54364 | 15.24389 | 13.00963 |
| O51 | 12.56204 | 9.90402  | 13.02803 |
| O52 | 7.16449  | 15.25016 | 13.00334 |
| O53 | 20.62304 | 12.53737 | 13.00334 |
| O54 | 15.22549 | 17.88351 | 13.02803 |
| O55 | 15.24389 | 12.54364 | 13.00963 |
| O56 | 15.25016 | 7.16449  | 13.00334 |
| O57 | 9.85281  | 17.93472 | 12.92308 |
| O58 | 9.90402  | 12.56204 | 13.02803 |
| O59 | 20.62304 | 15.25016 | 13.00334 |
| O60 | 15.25016 | 20.62304 | 13.00334 |
| O61 | 15.24389 | 15.24389 | 13.00963 |
| O62 | 15.22549 | 9.90402  | 13.02803 |
| O63 | 9.90402  | 15.22549 | 13.02803 |
| O64 | 9.85281  | 9.85281  | 12.92308 |
| O65 | 17.93472 | 12.45711 | 10.31880 |
| O66 | 12.45711 | 17.93472 | 10.31880 |
| O67 | 12.56204 | 12.56204 | 10.37002 |
| O68 | 15.33042 | 17.93472 | 10.31880 |
| O69 | 15.22549 | 12.56204 | 10.37002 |
| O70 | 9.85281  | 12.45711 | 10.31880 |
| O71 | 17.93472 | 15.33042 | 10.31880 |
| O72 | 12.56204 | 15.22549 | 10.37002 |
| O73 | 12.45711 | 9.85281  | 10.31880 |
| O74 | 15.33042 | 9.85281  | 10.31880 |
| O76 | 9.85281  | 15.33042 | 10.31880 |
| O77 | 12.53737 | 12.53737 | 7.63045  |
| O78 | 12.53737 | 15.25016 | 7.63045  |
| O79 | 15.25016 | 12.53737 | 7.63045  |
| O80 | 15.25016 | 15.25016 | 7.63045  |
